# Supplementary material for: Four New Antibacterial Xanthones from the Marine-Derived Actinomycetes Streptomyces caelestis
Source: Mar Drugs. 2012 Nov 20;10(11):2571–83. doi: 10.3390/md10112571 (PMC3509536; doi:10.3390/md10112571)
Supplement: Supplementary File 2: — CIF-Document (CIF, 24 KB) [file marinedrugs-10-02571-s004.cif]

 
data_307 
 
_audit_creation_method            SHELXL-97 
_chemical_name_systematic 
; 
 ? 
; 
_chemical_name_common             ? 
_chemical_melting_point           ? 
_chemical_formula_moiety          ? 
_chemical_formula_sum 
 'C30 H23 N O10' 
_chemical_formula_weight          557.49 
 
loop_ 
 _atom_type_symbol 
 _atom_type_description 
 _atom_type_scat_dispersion_real 
 _atom_type_scat_dispersion_imag 
 _atom_type_scat_source 
 'C'  'C'   0.0181   0.0091 
 'International Tables Vol C Tables 4.2.6.8 and 6.1.1.4' 
 'H'  'H'   0.0000   0.0000 
 'International Tables Vol C Tables 4.2.6.8 and 6.1.1.4' 
 'N'  'N'   0.0311   0.0180 
 'International Tables Vol C Tables 4.2.6.8 and 6.1.1.4' 
 'O'  'O'   0.0492   0.0322 
 'International Tables Vol C Tables 4.2.6.8 and 6.1.1.4' 
 
_symmetry_cell_setting            monoclinic 
_symmetry_space_group_name_H-M    'P 21/c'
 
loop_ 
 _symmetry_equiv_pos_as_xyz 
 'x, y, z' 
 '-x, y+1/2, -z+1/2' 
 '-x, -y, -z' 
 'x, -y-1/2, z-1/2' 
 
_cell_length_a                    15.307(3) 
_cell_length_b                    7.9472(16) 
_cell_length_c                    24.715(5) 
_cell_angle_alpha                 90.00 
_cell_angle_beta                  97.18(3) 
_cell_angle_gamma                 90.00 
_cell_volume                      2983.0(10) 
_cell_formula_units_Z             4 
_cell_measurement_temperature     296(2) 
_cell_measurement_reflns_used     ? 
_cell_measurement_theta_min       ? 
_cell_measurement_theta_max       ? 
 
_exptl_crystal_description        ? 
_exptl_crystal_colour             ? 
_exptl_crystal_size_max           0.28 
_exptl_crystal_size_mid           0.06 
_exptl_crystal_size_min           0.05 
_exptl_crystal_density_meas       ? 
_exptl_crystal_density_diffrn     1.241 
_exptl_crystal_density_method     'not measured' 
_exptl_crystal_F_000              1160 
_exptl_absorpt_coefficient_mu     0.795 
_exptl_absorpt_correction_type    ? 
_exptl_absorpt_correction_T_min   0.8082 
_exptl_absorpt_correction_T_max   0.9614 
_exptl_absorpt_process_details    ? 
 
_exptl_special_details 
; 
 ? 
; 
 
_diffrn_ambient_temperature       296(2) 
_diffrn_radiation_wavelength      1.54178 
_diffrn_radiation_type            CuK\a 
_diffrn_radiation_source          'fine-focus sealed tube' 
_diffrn_radiation_monochromator   graphite 
_diffrn_measurement_device_type   ? 
_diffrn_measurement_method        ? 
_diffrn_detector_area_resol_mean  ? 
_diffrn_standards_number          ? 
_diffrn_standards_interval_count  ? 
_diffrn_standards_interval_time   ? 
_diffrn_standards_decay_%         ? 
_diffrn_reflns_number             11429 
_diffrn_reflns_av_R_equivalents   0.0912 
_diffrn_reflns_av_sigmaI/netI     0.1647 
_diffrn_reflns_limit_h_min        -17 
_diffrn_reflns_limit_h_max        17 
_diffrn_reflns_limit_k_min        -9 
_diffrn_reflns_limit_k_max        8 
_diffrn_reflns_limit_l_min        -28 
_diffrn_reflns_limit_l_max        28 
_diffrn_reflns_theta_min          4.91 
_diffrn_reflns_theta_max          66.98 
_reflns_number_total              4797 
_reflns_number_gt                 2116 
_reflns_threshold_expression      >2sigma(I) 
 
_computing_data_collection        ? 
_computing_cell_refinement        ? 
_computing_data_reduction         ? 
_computing_structure_solution     'SHELXS-97 (Sheldrick, 1990)' 
_computing_structure_refinement   'SHELXL-97 (Sheldrick, 1997)' 
_computing_molecular_graphics     ? 
_computing_publication_material   ? 
 
_refine_special_details 
; 
 Refinement of F^2^ against ALL reflections.  The weighted R-factor wR and 
 goodness of fit S are based on F^2^, conventional R-factors R are based 
 on F, with F set to zero for negative F^2^. The threshold expression of 
 F^2^ > 2sigma(F^2^) is used only for calculating R-factors(gt) etc. and is 
 not relevant to the choice of reflections for refinement.  R-factors based 
 on F^2^ are statistically about twice as large as those based on F, and R- 
 factors based on ALL data will be even larger. 
; 
 
_refine_ls_structure_factor_coef  Fsqd  
_refine_ls_matrix_type            full 
_refine_ls_weighting_scheme       calc  
_refine_ls_weighting_details 
 'calc w=1/[\s^2^(Fo^2^)+(0.1000P)^2^+0.0000P] where P=(Fo^2^+2Fc^2^)/3' 
_atom_sites_solution_primary      direct 
_atom_sites_solution_secondary    difmap 
_atom_sites_solution_hydrogens    geom 
_refine_ls_hydrogen_treatment     mixed 
_refine_ls_extinction_method      SHELXL 
_refine_ls_extinction_coef        0.045(6) 
_refine_ls_extinction_expression 
 'Fc^*^=kFc[1+0.001xFc^2^\l^3^/sin(2\q)]^-1/4^' 
_refine_ls_number_reflns          4797 
_refine_ls_number_parameters      398 
_refine_ls_number_restraints      0 
_refine_ls_R_factor_all           0.2947 
_refine_ls_R_factor_gt            0.2224 
_refine_ls_wR_factor_ref          0.5021 
_refine_ls_wR_factor_gt           0.4653 
_refine_ls_goodness_of_fit_ref    1.848 
_refine_ls_restrained_S_all       1.848 
_refine_ls_shift/su_max           2.950 
_refine_ls_shift/su_mean          0.224 
 
loop_ 
 _atom_site_label 
 _atom_site_type_symbol 
 _atom_site_fract_x 
 _atom_site_fract_y 
 _atom_site_fract_z 
 _atom_site_U_iso_or_equiv 
 _atom_site_adp_type 
 _atom_site_occupancy 
 _atom_site_symmetry_multiplicity 
 _atom_site_calc_flag 
 _atom_site_refinement_flags 
 _atom_site_disorder_assembly 
 _atom_site_disorder_group 
O7 O 0.8640(5) 0.3151(10) 0.5263(3) 0.089(2) Uani 1 1 d . . . 
O8 O 0.8841(5) 0.5447(10) 0.3185(3) 0.105(3) Uani 1 1 d . . . 
O1' O 0.6270(13) -0.277(3) 0.6261(11) 0.218(12) Uani 0.50 1 d P . . 
O2' O 1.2396(12) 0.356(2) 0.3719(13) 0.225(15) Uani 0.50 1 d P . . 
O9 O 1.0166(5) 0.3720(10) 0.3696(3) 0.105(3) Uani 1 1 d . . . 
H9B H 1.0546 0.3192 0.3889 0.157 Uiso 1 1 calc R . . 
O10 O 1.0891(5) 0.2187(10) 0.4563(3) 0.102(2) Uani 1 1 d . . . 
O11 O 1.1528(5) 0.0632(10) 0.5448(3) 0.099(2) Uani 1 1 d . . . 
H11A H 1.1528 0.0999 0.5138 0.148 Uiso 1 1 calc R . . 
O12 O 1.1338(5) -0.0256(10) 0.6485(3) 0.101(3) Uani 1 1 d . . . 
H12A H 1.1808 0.0229 0.6476 0.151 Uiso 1 1 calc R . . 
O5 O 0.7437(4) 0.0894(9) 0.5502(2) 0.093(2) Uani 1 1 d . . . 
H5A H 0.6920 0.0691 0.5391 0.140 Uiso 1 1 calc R . . 
O4 O 0.5804(5) 0.0613(12) 0.5529(3) 0.116(3) Uani 1 1 d . . . 
O3 O 0.4467(12) -0.206(3) 0.6378(13) 0.370(13) Uani 1 1 d . B . 
H3A H 0.4984 -0.2293 0.6359 0.555 Uiso 1 1 calc R . . 
O2 O 0.3172(6) 0.0273(13) 0.6725(4) 0.135(3) Uani 1 1 d . . . 
O1 O 0.4522(6) 0.1057(14) 0.7071(4) 0.148(4) Uani 1 1 d . . . 
N4 N 0.5201(7) 0.0840(13) 0.6298(3) 0.110(3) Uani 1 1 d . . . 
C11 C 0.9476(7) 0.3972(13) 0.3967(4) 0.079(3) Uani 1 1 d . . . 
C10 C 0.8780(8) 0.4932(15) 0.3704(4) 0.092(3) Uani 1 1 d . . . 
C9 C 0.8026(9) 0.5157(17) 0.3968(4) 0.110(4) Uani 1 1 d . . . 
H9A H 0.7545 0.5742 0.3793 0.132 Uiso 1 1 calc R . . 
C8 C 0.7993(8) 0.4525(18) 0.4479(4) 0.110(4) Uani 1 1 d . . . 
H8A H 0.7481 0.4632 0.4642 0.132 Uiso 1 1 calc R . . 
C8' C 0.8703(8) 0.3744(14) 0.4748(4) 0.091(3) Uani 1 1 d . . . 
C7'' C 0.9317(7) 0.2247(14) 0.5543(4) 0.080(3) Uani 1 1 d . . . 
C7' C 0.9198(6) 0.1616(14) 0.6073(3) 0.074(3) Uani 1 1 d . B . 
C14' C 0.9902(8) 0.0989(14) 0.6379(4) 0.085(3) Uani 1 1 d . . . 
C14 C 1.0683(7) 0.0611(14) 0.6177(4) 0.084(3) Uani 1 1 d . . . 
C13 C 1.0772(7) 0.1029(14) 0.5630(4) 0.085(3) Uani 1 1 d . . . 
C12' C 1.0108(6) 0.1862(13) 0.5321(4) 0.071(3) Uani 1 1 d . . . 
C12 C 1.0186(7) 0.2472(14) 0.4776(4) 0.084(3) Uani 1 1 d . . . 
C11' C 0.9445(7) 0.3423(16) 0.4495(4) 0.090(3) Uani 1 1 d . . . 
C15 C 0.9840(7) 0.0734(18) 0.6992(4) 0.104(4) Uani 1 1 d . . . 
H15A H 0.9557 -0.0332 0.7051 0.124 Uiso 1 1 calc R . . 
H15B H 1.0423 0.0729 0.7196 0.124 Uiso 1 1 calc R . . 
C16 C 0.9305(8) 0.2167(16) 0.7176(4) 0.099(4) Uani 1 1 d . . . 
H16A H 0.9591 0.3226 0.7114 0.119 Uiso 1 1 calc R . . 
H16B H 0.9271 0.2066 0.7564 0.119 Uiso 1 1 calc R . . 
C16' C 0.8419(7) 0.2157(12) 0.6880(4) 0.080(3) Uani 1 1 d . B . 
C17 C 0.7691(7) 0.2205(13) 0.7147(4) 0.085(3) Uani 1 1 d . . . 
H17A H 0.7748 0.2486 0.7515 0.102 Uiso 1 1 calc R . . 
C17' C 0.6838(8) 0.1825(14) 0.6864(4) 0.087(3) Uani 1 1 d . B . 
C18 C 0.6013(8) 0.1878(19) 0.7146(5) 0.116(4) Uani 1 1 d . . . 
H18A H 0.6125 0.1221 0.7479 0.139 Uiso 1 1 calc R A 1 
H18B H 0.5924 0.3033 0.7254 0.139 Uiso 1 1 calc R A 1 
C2 C 0.3936(11) 0.0670(19) 0.6647(6) 0.122(5) Uani 1 1 d . B . 
C3 C 0.4283(7) 0.0583(18) 0.6127(5) 0.089(3) Uani 1 1 d . B . 
C5 C 0.5955(9) 0.0984(14) 0.6019(4) 0.092(3) Uani 1 1 d . B . 
C5' C 0.6748(7) 0.1379(13) 0.6296(4) 0.081(3) Uani 1 1 d . . . 
C6 C 0.7506(8) 0.1408(14) 0.6039(4) 0.085(3) Uani 1 1 d . B . 
C6' C 0.8349(7) 0.1809(15) 0.6311(4) 0.085(3) Uani 1 1 d . . . 
C23 C 0.8124(9) 0.6338(16) 0.2902(4) 0.114(4) Uani 1 1 d . . . 
H23A H 0.8249 0.6592 0.2540 0.170 Uiso 1 1 calc R . . 
H23B H 0.8035 0.7366 0.3091 0.170 Uiso 1 1 calc R . . 
H23C H 0.7602 0.5661 0.2882 0.170 Uiso 1 1 calc R . . 
C22 C 0.3864(12) 0.193(5) 0.5768(10) 0.36(2) Uani 1 1 d . . . 
H22A H 0.3961 0.3000 0.5946 0.544 Uiso 1 1 calc R B . 
H22B H 0.3242 0.1723 0.5694 0.544 Uiso 1 1 calc R . . 
H22C H 0.4116 0.1941 0.5431 0.544 Uiso 1 1 calc R . . 
C21 C 0.4113(13) -0.107(3) 0.5895(7) 0.158(8) Uani 1 1 d . . . 
H21A H 0.4434 -0.1270 0.5587 0.190 Uiso 1 1 calc R B . 
H21B H 0.3490 -0.1271 0.5790 0.190 Uiso 1 1 calc R . . 
C19 C 0.5319(18) 0.137(7) 0.6894(9) 0.57(4) Uani 1 1 d . B 1 
C20 C 0.5081(18) 0.401(4) 0.6644(16) 0.38(2) Uani 1 1 d . B 1 
H20A H 0.5048 0.4696 0.6961 0.563 Uiso 1 1 calc R B 1 
H20B H 0.4536 0.4089 0.6406 0.563 Uiso 1 1 calc R B 1 
H20C H 0.5554 0.4399 0.6455 0.563 Uiso 1 1 calc R B 1 
 
loop_ 
 _atom_site_aniso_label 
 _atom_site_aniso_U_11 
 _atom_site_aniso_U_22 
 _atom_site_aniso_U_33 
 _atom_site_aniso_U_23 
 _atom_site_aniso_U_13 
 _atom_site_aniso_U_12 
O7 0.087(5) 0.112(6) 0.070(4) 0.008(4) 0.022(4) 0.008(4) 
O8 0.122(7) 0.119(7) 0.078(4) 0.010(4) 0.031(4) 0.009(5) 
O1' 0.133(17) 0.14(2) 0.34(3) 0.066(17) -0.124(19) -0.021(12) 
O2' 0.096(14) 0.107(16) 0.50(5) 0.10(2) 0.13(2) 0.027(10) 
O9 0.076(5) 0.158(7) 0.088(4) -0.002(4) 0.038(4) -0.001(4) 
O10 0.101(5) 0.123(7) 0.090(4) 0.001(4) 0.051(4) 0.014(4) 
O11 0.090(5) 0.115(6) 0.098(5) 0.007(4) 0.036(4) 0.011(4) 
O12 0.072(5) 0.134(7) 0.094(5) 0.020(4) 0.006(4) -0.001(4) 
O5 0.087(5) 0.132(7) 0.063(4) -0.014(4) 0.021(3) -0.004(4) 
O4 0.100(6) 0.160(8) 0.089(5) -0.015(5) 0.019(4) 0.003(5) 
O3 0.182(17) 0.28(2) 0.68(4) -0.12(3) 0.16(2) -0.010(15) 
O2 0.089(6) 0.198(10) 0.119(6) -0.003(6) 0.025(5) 0.014(6) 
O1 0.112(7) 0.242(12) 0.099(6) -0.014(6) 0.049(5) -0.066(7) 
N4 0.092(7) 0.164(10) 0.080(5) 0.001(6) 0.034(5) -0.011(6) 
C11 0.090(8) 0.085(9) 0.066(5) 0.000(5) 0.024(5) -0.003(6) 
C10 0.103(9) 0.117(10) 0.060(5) -0.012(6) 0.024(6) -0.008(7) 
C9 0.129(11) 0.131(11) 0.072(6) -0.015(7) 0.026(7) 0.035(8) 
C8 0.088(9) 0.165(13) 0.083(7) 0.006(8) 0.033(6) 0.030(8) 
C8' 0.098(9) 0.106(10) 0.073(6) 0.002(6) 0.024(6) 0.022(7) 
C7'' 0.072(7) 0.096(9) 0.077(6) 0.001(6) 0.022(5) -0.012(5) 
C7' 0.062(6) 0.103(9) 0.060(5) -0.003(5) 0.020(4) 0.008(5) 
C14' 0.084(8) 0.099(9) 0.078(6) 0.007(6) 0.028(6) -0.022(6) 
C14 0.077(7) 0.089(8) 0.087(7) 0.001(6) 0.021(6) -0.009(6) 
C13 0.079(7) 0.099(9) 0.082(6) 0.002(6) 0.025(6) 0.006(6) 
C12' 0.073(6) 0.080(7) 0.060(5) -0.006(5) 0.017(5) 0.009(5) 
C12 0.065(7) 0.090(8) 0.100(7) -0.015(6) 0.031(5) -0.015(5) 
C11' 0.067(7) 0.129(10) 0.078(6) -0.013(6) 0.022(5) -0.002(6) 
C15 0.067(7) 0.173(13) 0.072(6) -0.002(7) 0.014(5) -0.016(7) 
C16 0.098(9) 0.137(12) 0.062(5) -0.019(6) 0.012(6) -0.026(7) 
C16' 0.093(8) 0.069(8) 0.084(6) -0.003(5) 0.033(6) -0.003(5) 
C17 0.081(8) 0.099(9) 0.079(6) -0.009(5) 0.029(6) -0.004(6) 
C17' 0.106(9) 0.089(8) 0.075(6) 0.005(5) 0.041(6) 0.010(6) 
C18 0.116(10) 0.139(11) 0.103(8) -0.014(8) 0.059(8) -0.002(8) 
C2 0.089(10) 0.162(14) 0.119(10) 0.004(9) 0.022(9) -0.003(9) 
C3 0.072(8) 0.102(10) 0.098(7) -0.024(7) 0.030(6) -0.015(6) 
C5 0.110(9) 0.106(10) 0.064(6) 0.002(6) 0.029(6) -0.008(7) 
C5' 0.075(7) 0.105(9) 0.064(5) 0.002(5) 0.019(5) -0.011(6) 
C6 0.092(8) 0.101(9) 0.069(6) -0.004(5) 0.032(6) 0.016(6) 
C6' 0.079(7) 0.118(9) 0.062(5) 0.021(6) 0.021(5) 0.007(6) 
C23 0.140(11) 0.115(12) 0.088(7) 0.009(7) 0.024(8) 0.004(8) 
C22 0.122(14) 0.69(6) 0.30(2) 0.38(3) 0.132(15) 0.18(2) 
C21 0.156(16) 0.19(2) 0.139(13) 0.042(14) 0.046(11) 0.057(13) 
C19 0.23(2) 1.33(10) 0.173(15) -0.38(4) 0.176(16) -0.50(4) 
C20 0.17(2) 0.28(4) 0.64(6) 0.06(3) -0.08(3) -0.03(2) 
 
_geom_special_details 
; 
 All esds (except the esd in the dihedral angle between two l.s. planes) 
 are estimated using the full covariance matrix.  The cell esds are taken 
 into account individually in the estimation of esds in distances, angles 
 and torsion angles; correlations between esds in cell parameters are only 
 used when they are defined by crystal symmetry.  An approximate (isotropic) 
 treatment of cell esds is used for estimating esds involving l.s. planes. 
; 
 
loop_ 
 _geom_bond_atom_site_label_1 
 _geom_bond_atom_site_label_2 
 _geom_bond_distance 
 _geom_bond_site_symmetry_2 
 _geom_bond_publ_flag 
O7 C8' 1.372(11) . ? 
O7 C7'' 1.374(12) . ? 
O8 C10 1.362(11) . ? 
O8 C23 1.415(12) . ? 
O9 C11 1.335(11) . ? 
O9 H9B 0.8200 . ? 
O10 C12 1.280(11) . ? 
O11 C13 1.330(11) . ? 
O11 H11A 0.8200 . ? 
O12 C14 1.366(11) . ? 
O12 H12A 0.8200 . ? 
O5 C6 1.381(10) . ? 
O5 H5A 0.8200 . ? 
O4 C5 1.240(11) . ? 
O3 C21 1.47(3) . ? 
O3 H3A 0.8200 . ? 
O2 C2 1.250(15) . ? 
O1 C2 1.329(15) . ? 
O1 C19 1.369(17) . ? 
N4 C5 1.420(13) . ? 
N4 C3 1.431(13) . ? 
N4 C19 1.521(17) . ? 
C11 C11' 1.381(13) . ? 
C11 C10 1.402(14) . ? 
C10 C9 1.406(14) . ? 
C9 C8 1.366(15) . ? 
C9 H9A 0.9300 . ? 
C8 C8' 1.352(14) . ? 
C8 H8A 0.9300 . ? 
C8' C11' 1.388(13) . ? 
C7'' C12' 1.423(12) . ? 
C7'' C7' 1.437(12) . ? 
C7' C14' 1.333(13) . ? 
C7' C6' 1.499(12) . ? 
C14' C14 1.385(13) . ? 
C14' C15 1.543(13) . ? 
C14 C13 1.416(13) . ? 
C13 C12' 1.363(12) . ? 
C12' C12 1.450(13) . ? 
C12 C11' 1.464(14) . ? 
C15 C16 1.506(16) . ? 
C15 H15A 0.9700 . ? 
C15 H15B 0.9700 . ? 
C16 C16' 1.458(14) . ? 
C16 H16A 0.9700 . ? 
C16 H16B 0.9700 . ? 
C16' C17 1.366(12) . ? 
C16' C6' 1.425(12) . ? 
C17 C17' 1.434(14) . ? 
C17 H17A 0.9300 . ? 
C17' C5' 1.437(13) . ? 
C17' C18 1.518(13) . ? 
C18 C19 1.230(18) . ? 
C18 H18A 0.9700 . ? 
C18 H18B 0.9700 . ? 
C2 C3 1.451(17) . ? 
C3 C21 1.44(2) . ? 
C3 C22 1.49(2) . ? 
C5 C5' 1.354(14) . ? 
C5' C6 1.391(13) . ? 
C6 C6' 1.415(14) . ? 
C23 H23A 0.9600 . ? 
C23 H23B 0.9600 . ? 
C23 H23C 0.9600 . ? 
C22 H22A 0.9600 . ? 
C22 H22B 0.9600 . ? 
C22 H22C 0.9600 . ? 
C21 H21A 0.9700 . ? 
C21 H21B 0.9700 . ? 
C19 C20 2.20(6) . ? 
C20 H20A 0.9600 . ? 
C20 H20B 0.9600 . ? 
C20 H20C 0.9600 . ? 
 
loop_ 
 _geom_angle_atom_site_label_1 
 _geom_angle_atom_site_label_2 
 _geom_angle_atom_site_label_3 
 _geom_angle 
 _geom_angle_site_symmetry_1 
 _geom_angle_site_symmetry_3 
 _geom_angle_publ_flag 
C8' O7 C7'' 120.7(8) . . ? 
C10 O8 C23 118.5(9) . . ? 
C11 O9 H9B 109.3 . . ? 
C13 O11 H11A 109.3 . . ? 
C14 O12 H12A 109.5 . . ? 
C6 O5 H5A 109.3 . . ? 
C21 O3 H3A 109.7 . . ? 
C2 O1 C19 109.4(12) . . ? 
C5 N4 C3 134.1(9) . . ? 
C5 N4 C19 116.2(10) . . ? 
C3 N4 C19 108.6(11) . . ? 
O9 C11 C11' 123.3(10) . . ? 
O9 C11 C10 116.9(9) . . ? 
C11' C11 C10 119.7(10) . . ? 
O8 C10 C11 117.6(10) . . ? 
O8 C10 C9 123.7(11) . . ? 
C11 C10 C9 118.4(10) . . ? 
C10 C9 C8 120.5(11) . . ? 
C10 C9 H9A 119.8 . . ? 
C8 C9 H9A 119.6 . . ? 
C8' C8 C9 120.3(11) . . ? 
C8' C8 H8A 119.8 . . ? 
C9 C8 H8A 119.9 . . ? 
C8 C8' O7 118.0(10) . . ? 
C8 C8' C11' 121.0(10) . . ? 
O7 C8' C11' 120.8(10) . . ? 
O7 C7'' C12' 122.9(8) . . ? 
O7 C7'' C7' 117.9(9) . . ? 
C12' C7'' C7' 119.1(10) . . ? 
C14' C7' C7'' 117.5(9) . . ? 
C14' C7' C6' 119.7(8) . . ? 
C7'' C7' C6' 122.4(9) . . ? 
C7' C14' C14 123.4(10) . . ? 
C7' C14' C15 117.4(10) . . ? 
C14 C14' C15 119.2(10) . . ? 
O12 C14 C14' 121.0(10) . . ? 
O12 C14 C13 119.9(10) . . ? 
C14' C14 C13 118.9(10) . . ? 
O11 C13 C12' 123.1(9) . . ? 
O11 C13 C14 117.3(10) . . ? 
C12' C13 C14 119.6(10) . . ? 
C13 C12' C7'' 120.0(9) . . ? 
C13 C12' C12 122.6(9) . . ? 
C7'' C12' C12 117.3(9) . . ? 
O10 C12 C11' 122.6(10) . . ? 
O10 C12 C12' 119.6(10) . . ? 
C11' C12 C12' 117.7(9) . . ? 
C11 C11' C8' 119.6(11) . . ? 
C11 C11' C12 119.8(10) . . ? 
C8' C11' C12 120.6(10) . . ? 
C16 C15 C14' 107.5(10) . . ? 
C16 C15 H15A 110.3 . . ? 
C14' C15 H15A 110.2 . . ? 
C16 C15 H15B 110.2 . . ? 
C14' C15 H15B 110.1 . . ? 
H15A C15 H15B 108.5 . . ? 
C15 C16 C16' 110.5(9) . . ? 
C15 C16 H16A 109.6 . . ? 
C16' C16 H16A 109.5 . . ? 
C15 C16 H16B 109.5 . . ? 
C16' C16 H16B 109.6 . . ? 
H16A C16 H16B 108.1 . . ? 
C17 C16' C6' 121.2(10) . . ? 
C17 C16' C16 121.4(9) . . ? 
C6' C16' C16 116.6(9) . . ? 
C16' C17 C17' 120.4(9) . . ? 
C16' C17 H17A 119.8 . . ? 
C17' C17 H17A 119.7 . . ? 
C17 C17' C5' 120.0(9) . . ? 
C17 C17' C18 121.9(9) . . ? 
C5' C17' C18 118.1(10) . . ? 
C19 C18 C17' 118.3(13) . . ? 
C19 C18 H18A 104.6 . . ? 
C17' C18 H18A 107.5 . . ? 
C19 C18 H18B 111.5 . . ? 
C17' C18 H18B 107.4 . . ? 
H18A C18 H18B 107.0 . . ? 
O2 C2 O1 119.3(14) . . ? 
O2 C2 C3 125.4(14) . . ? 
O1 C2 C3 115.0(13) . . ? 
N4 C3 C2 100.8(10) . . ? 
N4 C3 C21 111.6(12) . . ? 
C2 C3 C21 109.1(12) . . ? 
N4 C3 C22 114.1(15) . . ? 
C2 C3 C22 108.4(14) . . ? 
C21 C3 C22 112.1(19) . . ? 
O4 C5 C5' 126.5(11) . . ? 
O4 C5 N4 113.1(11) . . ? 
C5' C5 N4 120.3(9) . . ? 
C5 C5' C6 121.2(9) . . ? 
C5 C5' C17' 121.5(10) . . ? 
C6 C5' C17' 117.3(9) . . ? 
C5' C6 C6' 123.4(9) . . ? 
C5' C6 O5 117.8(10) . . ? 
C6' C6 O5 118.6(9) . . ? 
C6 C6' C16' 117.6(9) . . ? 
C6 C6' C7' 125.1(9) . . ? 
C16' C6' C7' 116.4(9) . . ? 
O8 C23 H23A 109.2 . . ? 
O8 C23 H23B 109.8 . . ? 
H23A C23 H23B 109.5 . . ? 
O8 C23 H23C 109.5 . . ? 
H23A C23 H23C 109.5 . . ? 
H23B C23 H23C 109.5 . . ? 
C3 C22 H22A 109.4 . . ? 
C3 C22 H22B 109.7 . . ? 
H22A C22 H22B 109.5 . . ? 
C3 C22 H22C 109.3 . . ? 
H22A C22 H22C 109.5 . . ? 
H22B C22 H22C 109.5 . . ? 
C3 C21 O3 97.8(17) . . ? 
C3 C21 H21A 112.0 . . ? 
O3 C21 H21A 112.0 . . ? 
C3 C21 H21B 112.4 . . ? 
O3 C21 H21B 112.4 . . ? 
H21A C21 H21B 109.8 . . ? 
C18 C19 O1 130.2(14) . . ? 
C18 C19 N4 124.9(13) . . ? 
O1 C19 N4 104.8(12) . . ? 
C18 C19 C20 86(3) . . ? 
O1 C19 C20 98(3) . . ? 
N4 C19 C20 90(3) . . ? 
C19 C20 H20A 109.9 . . ? 
C19 C20 H20B 109.5 . . ? 
H20A C20 H20B 109.5 . . ? 
C19 C20 H20C 109.0 . . ? 
H20A C20 H20C 109.5 . . ? 
H20B C20 H20C 109.5 . . ? 
 
loop_ 
 _geom_torsion_atom_site_label_1 
 _geom_torsion_atom_site_label_2 
 _geom_torsion_atom_site_label_3 
 _geom_torsion_atom_site_label_4 
 _geom_torsion 
 _geom_torsion_site_symmetry_1 
 _geom_torsion_site_symmetry_2 
 _geom_torsion_site_symmetry_3 
 _geom_torsion_site_symmetry_4 
 _geom_torsion_publ_flag 
C23 O8 C10 C11 176.6(9) . . . . ? 
C23 O8 C10 C9 3.5(16) . . . . ? 
O9 C11 C10 O8 3.7(15) . . . . ? 
C11' C11 C10 O8 179.9(9) . . . . ? 
O9 C11 C10 C9 177.1(10) . . . . ? 
C11' C11 C10 C9 -6.6(16) . . . . ? 
O8 C10 C9 C8 176.3(11) . . . . ? 
C11 C10 C9 C8 3.2(18) . . . . ? 
C10 C9 C8 C8' 3(2) . . . . ? 
C9 C8 C8' O7 179.1(11) . . . . ? 
C9 C8 C8' C11' -6(2) . . . . ? 
C7'' O7 C8' C8 175.5(10) . . . . ? 
C7'' O7 C8' C11' 0.9(16) . . . . ? 
C8' O7 C7'' C12' -0.4(15) . . . . ? 
C8' O7 C7'' C7' -178.0(9) . . . . ? 
O7 C7'' C7' C14' -169.1(9) . . . . ? 
C12' C7'' C7' C14' 13.3(15) . . . . ? 
O7 C7'' C7' C6' 4.3(15) . . . . ? 
C12' C7'' C7' C6' -173.4(9) . . . . ? 
C7'' C7' C14' C14 -13.3(16) . . . . ? 
C6' C7' C14' C14 173.2(10) . . . . ? 
C7'' C7' C14' C15 164.8(10) . . . . ? 
C6' C7' C14' C15 -8.7(15) . . . . ? 
C7' C14' C14 O12 -170.2(10) . . . . ? 
C15 C14' C14 O12 11.8(15) . . . . ? 
C7' C14' C14 C13 5.3(16) . . . . ? 
C15 C14' C14 C13 -172.7(9) . . . . ? 
O12 C14 C13 O11 -3.8(15) . . . . ? 
C14' C14 C13 O11 -179.4(9) . . . . ? 
O12 C14 C13 C12' 178.5(9) . . . . ? 
C14' C14 C13 C12' 3.0(15) . . . . ? 
O11 C13 C12' C7'' -179.9(9) . . . . ? 
C14 C13 C12' C7'' -2.4(15) . . . . ? 
O11 C13 C12' C12 -3.6(16) . . . . ? 
C14 C13 C12' C12 174.0(9) . . . . ? 
O7 C7'' C12' C13 176.8(10) . . . . ? 
C7' C7'' C12' C13 -5.6(15) . . . . ? 
O7 C7'' C12' C12 0.2(14) . . . . ? 
C7' C7'' C12' C12 177.8(9) . . . . ? 
C13 C12' C12 O10 2.2(15) . . . . ? 
C7'' C12' C12 O10 178.6(8) . . . . ? 
C13 C12' C12 C11' -177.0(10) . . . . ? 
C7'' C12' C12 C11' -0.5(14) . . . . ? 
O9 C11 C11' C8' 179.7(9) . . . . ? 
C10 C11 C11' C8' 3.8(17) . . . . ? 
O9 C11 C11' C12 -1.8(16) . . . . ? 
C10 C11 C11' C12 -177.8(10) . . . . ? 
C8 C8' C11' C11 2.8(18) . . . . ? 
O7 C8' C11' C11 177.2(9) . . . . ? 
C8 C8' C11' C12 -175.7(11) . . . . ? 
O7 C8' C11' C12 -1.2(17) . . . . ? 
O10 C12 C11' C11 3.4(16) . . . . ? 
C12' C12 C11' C11 -177.4(10) . . . . ? 
O10 C12 C11' C8' -178.1(10) . . . . ? 
C12' C12 C11' C8' 1.0(15) . . . . ? 
C7' C14' C15 C16 -36.5(13) . . . . ? 
C14 C14' C15 C16 141.7(10) . . . . ? 
C14' C15 C16 C16' 61.3(12) . . . . ? 
C15 C16 C16' C17 128.0(11) . . . . ? 
C15 C16 C16' C6' -41.7(14) . . . . ? 
C6' C16' C17 C17' 3.0(15) . . . . ? 
C16 C16' C17 C17' -166.2(11) . . . . ? 
C16' C17 C17' C5' 0.4(16) . . . . ? 
C16' C17 C17' C18 -179.5(10) . . . . ? 
C17 C17' C18 C19 -173(3) . . . . ? 
C5' C17' C18 C19 7(3) . . . . ? 
C19 O1 C2 O2 177(3) . . . . ? 
C19 O1 C2 C3 3(3) . . . . ? 
C5 N4 C3 C2 -177.1(12) . . . . ? 
C19 N4 C3 C2 -10(3) . . . . ? 
C5 N4 C3 C21 67.2(18) . . . . ? 
C19 N4 C3 C21 -126(2) . . . . ? 
C5 N4 C3 C22 -61(2) . . . . ? 
C19 N4 C3 C22 106(3) . . . . ? 
O2 C2 C3 N4 -168.8(14) . . . . ? 
O1 C2 C3 N4 4.6(16) . . . . ? 
O2 C2 C3 C21 -51.3(19) . . . . ? 
O1 C2 C3 C21 122.2(15) . . . . ? 
O2 C2 C3 C22 71(2) . . . . ? 
O1 C2 C3 C22 -115.5(19) . . . . ? 
C3 N4 C5 O4 -10.2(19) . . . . ? 
C19 N4 C5 O4 -176(3) . . . . ? 
C3 N4 C5 C5' 174.1(13) . . . . ? 
C19 N4 C5 C5' 8(3) . . . . ? 
O4 C5 C5' C6 0.2(18) . . . . ? 
N4 C5 C5' C6 175.3(10) . . . . ? 
O4 C5 C5' C17' 178.7(11) . . . . ? 
N4 C5 C5' C17' -6.2(17) . . . . ? 
C17 C17' C5' C5 178.8(11) . . . . ? 
C18 C17' C5' C5 -1.3(16) . . . . ? 
C17 C17' C5' C6 -2.6(15) . . . . ? 
C18 C17' C5' C6 177.3(10) . . . . ? 
C5 C5' C6 C6' -179.8(11) . . . . ? 
C17' C5' C6 C6' 1.6(16) . . . . ? 
C5 C5' C6 O5 -4.9(16) . . . . ? 
C17' C5' C6 O5 176.5(9) . . . . ? 
C5' C6 C6' C16' 1.6(16) . . . . ? 
O5 C6 C6' C16' -173.3(9) . . . . ? 
C5' C6 C6' C7' 170.7(10) . . . . ? 
O5 C6 C6' C7' -4.2(16) . . . . ? 
C17 C16' C6' C6 -4.0(15) . . . . ? 
C16 C16' C6' C6 165.7(10) . . . . ? 
C17 C16' C6' C7' -174.0(10) . . . . ? 
C16 C16' C6' C7' -4.3(14) . . . . ? 
C14' C7' C6' C6 -137.6(11) . . . . ? 
C7'' C7' C6' C6 49.2(16) . . . . ? 
C14' C7' C6' C16' 31.6(14) . . . . ? 
C7'' C7' C6' C16' -141.6(10) . . . . ? 
N4 C3 C21 O3 60.0(15) . . . . ? 
C2 C3 C21 O3 -50.4(17) . . . . ? 
C22 C3 C21 O3 -170.5(12) . . . . ? 
C17' C18 C19 O1 169(4) . . . . ? 
C17' C18 C19 N4 -6(6) . . . . ? 
C17' C18 C19 C20 -93(2) . . . . ? 
C2 O1 C19 C18 175(5) . . . . ? 
C2 O1 C19 N4 -9(4) . . . . ? 
C2 O1 C19 C20 82.6(17) . . . . ? 
C5 N4 C19 C18 -2(6) . . . . ? 
C3 N4 C19 C18 -171(4) . . . . ? 
C5 N4 C19 O1 -178(2) . . . . ? 
C3 N4 C19 O1 13(4) . . . . ? 
C5 N4 C19 C20 84(2) . . . . ? 
C3 N4 C19 C20 -85.8(12) . . . . ? 
 
loop_ 
 _geom_hbond_atom_site_label_D 
 _geom_hbond_atom_site_label_H 
 _geom_hbond_atom_site_label_A 
 _geom_hbond_distance_DH 
 _geom_hbond_distance_HA 
 _geom_hbond_distance_DA 
 _geom_hbond_angle_DHA 
 _geom_hbond_site_symmetry_A 
O9 H9B O10  0.82 1.86 2.591(10) 147.4 . 
O11 H11A O10  0.82 1.87 2.593(10) 145.9 . 
O5 H5A O4  0.82 1.78 2.518(10) 148.4 . 
O3 H3A O1'  0.82 2.05 2.87(3) 175.5 . 
 
_diffrn_measured_fraction_theta_max    0.902 
_diffrn_reflns_theta_full              66.98 
_diffrn_measured_fraction_theta_full   0.902 
_refine_diff_density_max    0.844 
_refine_diff_density_min   -0.579 
_refine_diff_density_rms    0.223 
